# Supplementary material
Source: HighWire-hosted journal article supplement (https://bmjopen.bmj.com/content/8/10/e023068)
Supplement: inline-supplementary-material-1 [file inline-supplementary-material-1.pdf]

# Appendix 1: ACTIVATE Patient Activation and Engagement Assessment Survey and Results

University of California, Berkeley, Advocate Health Care and DaVita HealthCare Partners

Practice name:

---

Location (Street, City):

---

Following are four pages of brief questions regarding the extent to which *your practice* uses Patient Activation and Engagement strategies for patients with diabetes and/or cardiovascular disease. We appreciate your taking the time to answer these questions by indicating with a checkmark (☒) the extent to which these strategies have been implemented, ranging from “no use” to “fully implemented” in *your practice*.

|                                                                                                                                                                                                      | Yes, fully implemented-<br>all physicians do this | Yes, partially implemented<br>– about half of our physicians do this | Yes, but not regularly<br>– some do this but not on a regular basis | No                       |
|------------------------------------------------------------------------------------------------------------------------------------------------------------------------------------------------------|---------------------------------------------------|----------------------------------------------------------------------|---------------------------------------------------------------------|--------------------------|
| <b>A. Please indicate whether <i>your practice</i> uses any of the following strategies with respect to patient care outreach in regard to disease prevention and health promotion.</b>              |                                                   |                                                                      |                                                                     |                          |
| 1. Conducts a Health Risk Assessment (HRA) Survey with patients                                                                                                                                      | <input type="checkbox"/>                          | <input type="checkbox"/>                                             | <input type="checkbox"/>                                            | <input type="checkbox"/> |
| 2. Provides patients feedback on their HRA results                                                                                                                                                   | <input type="checkbox"/>                          | <input type="checkbox"/>                                             | <input type="checkbox"/>                                            | <input type="checkbox"/> |
| 3. Provides ongoing monitor of HRA results (assessing over time changes)                                                                                                                             | <input type="checkbox"/>                          | <input type="checkbox"/>                                             | <input type="checkbox"/>                                            | <input type="checkbox"/> |
| 4. Refers patients to a disease prevention or health promotion program as a result of the HRA                                                                                                        | <input type="checkbox"/>                          | <input type="checkbox"/>                                             | <input type="checkbox"/>                                            | <input type="checkbox"/> |
| 5. Encourages relevant patients to participate in a Healthy Eating Program                                                                                                                           | <input type="checkbox"/>                          | <input type="checkbox"/>                                             | <input type="checkbox"/>                                            | <input type="checkbox"/> |
| 6. Encourages relevant patients to participate in a Physical Activity Program                                                                                                                        | <input type="checkbox"/>                          | <input type="checkbox"/>                                             | <input type="checkbox"/>                                            | <input type="checkbox"/> |
| 7. Encourages relevant patients to participate in an Employee Health Promotion/Prevention/Wellness Program                                                                                           | <input type="checkbox"/>                          | <input type="checkbox"/>                                             | <input type="checkbox"/>                                            | <input type="checkbox"/> |
| 8. Sponsors or participates in School Health Clinic interventions                                                                                                                                    | <input type="checkbox"/>                          | <input type="checkbox"/>                                             | <input type="checkbox"/>                                            | <input type="checkbox"/> |
| <b>B. Please indicate whether <i>your practice</i> has implemented any of the following processes for patient communication, motivational interviewing, and involvement in treatment care plans.</b> |                                                   |                                                                      |                                                                     |                          |
| 9. Health Risk Assessment results are available electronically to care team members (through the electronic medical record) at the point of care                                                     | <input type="checkbox"/>                          | <input type="checkbox"/>                                             | <input type="checkbox"/>                                            | <input type="checkbox"/> |

|                                                                                                                                                            |                                                       |                                                                          |                                                                         |                          |
|------------------------------------------------------------------------------------------------------------------------------------------------------------|-------------------------------------------------------|--------------------------------------------------------------------------|-------------------------------------------------------------------------|--------------------------|
| 10. Clinicians are trained in motivational interviewing techniques                                                                                         | <input type="checkbox"/>                              | <input type="checkbox"/>                                                 | <input type="checkbox"/>                                                | <input type="checkbox"/> |
| 11. Clinicians consistently use motivational interviewing techniques in communicating with patients (e.g. encourage patients to ask questions)             | <input type="checkbox"/>                              | <input type="checkbox"/>                                                 | <input type="checkbox"/>                                                | <input type="checkbox"/> |
| 12. Clinicians consistently encourage patients to discuss their work, home life, and social situation                                                      | <input type="checkbox"/>                              | <input type="checkbox"/>                                                 | <input type="checkbox"/>                                                | <input type="checkbox"/> |
|                                                                                                                                                            | <b>Yes, fully implemented- all physicians do this</b> | <b>Yes, partially implemented – about half of our physicians do this</b> | <b>Yes, but not regularly – some do this but not on a regular basis</b> | <b>No</b>                |
| 13. Staff are trained in motivational interviewing techniques                                                                                              | <input type="checkbox"/>                              | <input type="checkbox"/>                                                 | <input type="checkbox"/>                                                | <input type="checkbox"/> |
| 14. Staff consistently use motivational interviewing techniques in communicating with patients (e.g. encourage patients to ask questions)                  | <input type="checkbox"/>                              | <input type="checkbox"/>                                                 | <input type="checkbox"/>                                                | <input type="checkbox"/> |
| 15. Staff note patient preferences for treatment in the patient’s record                                                                                   | <input type="checkbox"/>                              | <input type="checkbox"/>                                                 | <input type="checkbox"/>                                                | <input type="checkbox"/> |
| 16. Select staff serve as “health coaches” for patients seeking to modify their lifestyle                                                                  | <input type="checkbox"/>                              | <input type="checkbox"/>                                                 | <input type="checkbox"/>                                                | <input type="checkbox"/> |
| 17. Patients can routinely <u>provide</u> information on their care and their health via patient portal (not just access)                                  | <input type="checkbox"/>                              | <input type="checkbox"/>                                                 | <input type="checkbox"/>                                                | <input type="checkbox"/> |
| 18. Telehealth is consistently made available to patients with diabetes                                                                                    | <input type="checkbox"/>                              | <input type="checkbox"/>                                                 | <input type="checkbox"/>                                                | <input type="checkbox"/> |
| 19. Telehealth is consistently made available to patients with cardiovascular disease                                                                      | <input type="checkbox"/>                              | <input type="checkbox"/>                                                 | <input type="checkbox"/>                                                | <input type="checkbox"/> |
| <b>C. Please indicate whether <i>your practice</i> has implemented any of the following processes for shared decision-making.</b>                          |                                                       |                                                                          |                                                                         |                          |
| 20. Clinicians consistently involve patients in developing treatment goals                                                                                 | <input type="checkbox"/>                              | <input type="checkbox"/>                                                 | <input type="checkbox"/>                                                | <input type="checkbox"/> |
| 21. Clinicians or staff review goal-setting for behavioral changes with patients as a result of their HRA                                                  | <input type="checkbox"/>                              | <input type="checkbox"/>                                                 | <input type="checkbox"/>                                                | <input type="checkbox"/> |
| 22. Practice provides eligible patients with shared decision making videos                                                                                 | <input type="checkbox"/>                              | <input type="checkbox"/>                                                 | <input type="checkbox"/>                                                | <input type="checkbox"/> |
| 23. Physicians consistently have follow up discussions with patients regarding their treatment options and preferences                                     | <input type="checkbox"/>                              | <input type="checkbox"/>                                                 | <input type="checkbox"/>                                                | <input type="checkbox"/> |
| 24. There is a formal evaluation of the impact of shared decision making on patient care choices, outcomes of care, and patient experience with their care | <input type="checkbox"/>                              | <input type="checkbox"/>                                                 | <input type="checkbox"/>                                                | <input type="checkbox"/> |

|                                                                                                                                                                                                |                                                           |                                                                              |                                                                             |                          |
|------------------------------------------------------------------------------------------------------------------------------------------------------------------------------------------------|-----------------------------------------------------------|------------------------------------------------------------------------------|-----------------------------------------------------------------------------|--------------------------|
| 25. There exists an organized follow up program to assist patients in managing their medications at home, e.g., pharmacist-led medication management                                           | <input type="checkbox"/>                                  | <input type="checkbox"/>                                                     | <input type="checkbox"/>                                                    | <input type="checkbox"/> |
|                                                                                                                                                                                                | <b>Yes, fully implemented-<br/>all physicians do this</b> | <b>Yes, partially implemented<br/>– about half of our physicians do this</b> | <b>Yes, but not regularly<br/>– some do this but not on a regular basis</b> | <b>No</b>                |
| 26. Shared medical appointments (group visits) are available for patients with diabetes                                                                                                        | <input type="checkbox"/>                                  | <input type="checkbox"/>                                                     | <input type="checkbox"/>                                                    | <input type="checkbox"/> |
| 27. Shared medical appointments (group visits) are available for patients with cardiovascular disease                                                                                          | <input type="checkbox"/>                                  | <input type="checkbox"/>                                                     | <input type="checkbox"/>                                                    | <input type="checkbox"/> |
| 28. Peer to Peer (Patient to Patient) programs are available for patients with diabetes                                                                                                        | <input type="checkbox"/>                                  | <input type="checkbox"/>                                                     | <input type="checkbox"/>                                                    | <input type="checkbox"/> |
| 29. Peer to Peer (Patient to Patient) programs are available for patients with cardiovascular disease                                                                                          | <input type="checkbox"/>                                  | <input type="checkbox"/>                                                     | <input type="checkbox"/>                                                    | <input type="checkbox"/> |
| 30. Programs exist to improve family participation and support for patients with diabetes                                                                                                      | <input type="checkbox"/>                                  | <input type="checkbox"/>                                                     | <input type="checkbox"/>                                                    | <input type="checkbox"/> |
| 31. Programs exist to improve family participation and support for patients with cardiovascular disease                                                                                        | <input type="checkbox"/>                                  | <input type="checkbox"/>                                                     | <input type="checkbox"/>                                                    | <input type="checkbox"/> |
| <b>D. Please indicate whether <i>your practice</i> has available the following for patient self-management of their condition.</b>                                                             |                                                           |                                                                              |                                                                             |                          |
| 32. At home monitoring devices and/or tools to assess medication management, blood pressure, blood sugar, and lipids                                                                           | <input type="checkbox"/>                                  | <input type="checkbox"/>                                                     | <input type="checkbox"/>                                                    | <input type="checkbox"/> |
| <b>E. Please indicate whether <i>your practice</i> has implemented any of the following processes for end of life/advanced serious illness care patient engagement and family involvement.</b> |                                                           |                                                                              |                                                                             |                          |
| 33. Clinicians consistently discuss the importance of patient advanced directives (Care for Older/Vulnerable Adults)                                                                           | <input type="checkbox"/>                                  | <input type="checkbox"/>                                                     | <input type="checkbox"/>                                                    | <input type="checkbox"/> |
| 34. Clinicians consistently discuss hospice care options with patients (Care for Older/Vulnerable Adults)                                                                                      | <input type="checkbox"/>                                  | <input type="checkbox"/>                                                     | <input type="checkbox"/>                                                    | <input type="checkbox"/> |
| 35. Clinicians consistently discuss the availability of both hospital based and community based palliative care with patients (Care for Older/Vulnerable Adults)                               | <input type="checkbox"/>                                  | <input type="checkbox"/>                                                     | <input type="checkbox"/>                                                    | <input type="checkbox"/> |
|                                                                                                                                                                                                | <b>Yes, fully implemented-<br/>all physicians do this</b> | <b>Yes, partially implemented<br/>– about half of our physicians do this</b> | <b>Yes, but not regularly<br/>– some do this but not on a regular basis</b> | <b>No</b>                |

| F. Please indicate whether any of the following processes are used for patient involvement in the overall design of care and in organization-wide efforts to improve the quality of care at <i>your practice</i> . |                          |                          |                          |                          |
|--------------------------------------------------------------------------------------------------------------------------------------------------------------------------------------------------------------------|--------------------------|--------------------------|--------------------------|--------------------------|
| 36. Patient advisory councils exist for patients with diabetes                                                                                                                                                     | <input type="checkbox"/> | <input type="checkbox"/> | <input type="checkbox"/> | <input type="checkbox"/> |
| 37. Patient advisory councils exist for patients with cardiovascular disease                                                                                                                                       | <input type="checkbox"/> | <input type="checkbox"/> | <input type="checkbox"/> | <input type="checkbox"/> |
| 38. Patients consistently participate in quality improvement teams                                                                                                                                                 | <input type="checkbox"/> | <input type="checkbox"/> | <input type="checkbox"/> | <input type="checkbox"/> |
| 39. Patients are involved in helping to govern the clinic/practice                                                                                                                                                 | <input type="checkbox"/> | <input type="checkbox"/> | <input type="checkbox"/> | <input type="checkbox"/> |

| G. Please check the organizations your practice partners with to implement any of the Patient Activation and Engagement strategies checked above: |                          |
|---------------------------------------------------------------------------------------------------------------------------------------------------|--------------------------|
| Faith community                                                                                                                                   | <input type="checkbox"/> |
| Health insurer                                                                                                                                    | <input type="checkbox"/> |
| Skilled nursing facilities                                                                                                                        | <input type="checkbox"/> |
| Home health agencies                                                                                                                              | <input type="checkbox"/> |
| Hospital                                                                                                                                          | <input type="checkbox"/> |
| Housing agency                                                                                                                                    | <input type="checkbox"/> |
| Library                                                                                                                                           | <input type="checkbox"/> |
| Local public health department                                                                                                                    | <input type="checkbox"/> |
| Parks and Recreation                                                                                                                              | <input type="checkbox"/> |
| Schools                                                                                                                                           | <input type="checkbox"/> |
| Transportation                                                                                                                                    | <input type="checkbox"/> |
| University                                                                                                                                        | <input type="checkbox"/> |
| Utility company                                                                                                                                   | <input type="checkbox"/> |
| Other (Specify: _____)                                                                                                                            | <input type="checkbox"/> |

**THANK YOU FOR COMPLETING THIS SURVEY!**
