# Supplementary material
Source: HighWire-hosted journal article supplement (https://bmjopen.bmj.com/content/8/10/e023068)
Supplement: inline-supplementary-material-2 [file inline-supplementary-material-2.pdf]

## Appendix 2: Interview guide

### Semi-structured interview guide topics in both cycles

| Concept            | Detail and Sample Questions                                                                                                                                                                                                                                                                                             | Cycle 1 |   |
|--------------------|-------------------------------------------------------------------------------------------------------------------------------------------------------------------------------------------------------------------------------------------------------------------------------------------------------------------------|---------|---|
| Patient activation | <p>Definitions, background, and organizational context</p> <p>Questions included</p> <p>How would you define PAE? What do the words PAE mean to you?</p> <p>How important do you think PAE is to what you are trying to achieve at your organization?</p>                                                               | ✓       |   |
| Patient care       | <p>Specific patient engagement activities</p> <p>Questions included</p> <p>What efforts does your organization make to encourage their participation in their care?</p> <p>Can you tell me about some recent PAE initiatives for patients with diabetes or cardiovascular disease that your organization has tried?</p> | ✓       |   |
|                    | <p>Goal-setting activities</p> <p>Questions included</p> <p>Do you have programs or strategies in place to help patients set and reach goals for their own health and health care?</p>                                                                                                                                  | ✓       | ✓ |
|                    | <p>Tools (forms, action planning, goal setting, SDM)</p> <p>Questions included</p> <p>Do you use any specific materials or tools (forms, action planning, goal setting, SDM, etc.)?</p>                                                                                                                                 |         | ✓ |
|                    | <p>Use of Patient Activation Measure</p> <p>Questions include:</p> <p>Do you use the Patient Activation Measure (PAM) to assess patients? If so, how often and how are the results used?</p>                                                                                                                            | ✓       | ✓ |

|                                          |                                                                                                                                                                                                                              |   |   |
|------------------------------------------|------------------------------------------------------------------------------------------------------------------------------------------------------------------------------------------------------------------------------|---|---|
|                                          | Motivational interviewing (training or orientation)                                                                                                                                                                          | ✓ | ✓ |
|                                          | Questions included                                                                                                                                                                                                           |   |   |
|                                          | Do you routinely assess and capture what patients most care about their disease or in their life as a whole (what they worry or stress about or what they are passionate/motivated about or find meaningful or pleasurable)? |   |   |
| Programs and training                    | Training in patient activation training activities                                                                                                                                                                           | ✓ | ✓ |
|                                          | Questions include:                                                                                                                                                                                                           |   |   |
|                                          | Are you aware of any training activities for physicians and other clinical staff that focus on PAE at your organization?                                                                                                     |   |   |
| Organizational characteristics and teams | Team structure; access and continuity of care                                                                                                                                                                                | ✓ | ✓ |
|                                          | Questions included                                                                                                                                                                                                           |   |   |
|                                          | How many teams are there?                                                                                                                                                                                                    |   |   |
|                                          | How consistent are practices across the teams?                                                                                                                                                                               |   |   |
|                                          | What is the composition of a team?                                                                                                                                                                                           |   |   |
| Use of feedback reports                  | Usefulness of feedback reports from research team                                                                                                                                                                            | ✓ | ✓ |
|                                          | Questions included                                                                                                                                                                                                           |   |   |
|                                          | What aspect of the feedback reports was most useful?                                                                                                                                                                         |   |   |
