# Supplementary material
Source: HighWire-hosted journal article supplement (https://bmjopen.bmj.com/content/8/10/e023068)
Supplement: inline-supplementary-material-4 [file inline-supplementary-material-4.pdf]

## APPENDIX 4 - COREQ CHECKLIST

| No | Item | Guide questions/description | Page in document |
|----|------|-----------------------------|------------------|
|----|------|-----------------------------|------------------|

### Domain 1: Research team and reflexivity

#### Personal Characteristics

- |    |                         |                                                        |   |
|----|-------------------------|--------------------------------------------------------|---|
| 1. | Interviewer/facilitator | Which author/s conducted the interview or focus group? | 7 |
| 2. | Credentials             | What were the researcher's credentials? E.g. PhD, MD   | 7 |
| 3. | Occupation              | What was their occupation at the time of the study?    | 7 |
| 4. | Gender                  | Was the researcher male or female?                     | 7 |
| 5. | Experience and training | What experience or training did the researcher have?   | 7 |

#### Relationship with participants

- |    |                                          |                                                                                                                                           |   |
|----|------------------------------------------|-------------------------------------------------------------------------------------------------------------------------------------------|---|
| 6. | Relationship established                 | Was a relationship established prior to study commencement?                                                                               | 7 |
| 7. | Participant knowledge of the interviewer | What did the participants know about the researcher? e.g. personal goals, reasons for doing the research                                  | 7 |
| 8. | Interviewer characteristics              | What characteristics were reported about the interviewer/facilitator? e.g. Bias, assumptions, reasons and interests in the research topic | 7 |

### Domain 2: study design

#### Theoretical framework

- |    |                                       |                                                                                                                                                          |   |
|----|---------------------------------------|----------------------------------------------------------------------------------------------------------------------------------------------------------|---|
| 9. | Methodological orientation and Theory | What methodological orientation was stated to underpin the study? e.g. grounded theory, discourse analysis, ethnography, phenomenology, content analysis | 6 |
|----|---------------------------------------|----------------------------------------------------------------------------------------------------------------------------------------------------------|---|

#### Participant selection

|     |                    |                                                                                    |     |
|-----|--------------------|------------------------------------------------------------------------------------|-----|
| 10. | Sampling           | How were participants selected? e.g. purposive, convenience, consecutive, snowball | 5   |
| 11. | Method of approach | How were participants approached? e.g. face-to-face, telephone, mail, email        | 5   |
| 12. | Sample size        | How many participants were in the study?                                           | 8   |
| 13. | Non-participation  | How many people refused to participate or dropped out? Reasons?                    | N/A |

#### Setting

|     |                              |                                                                                   |   |
|-----|------------------------------|-----------------------------------------------------------------------------------|---|
| 14. | Setting of data collection   | Where was the data collected? e.g. home, clinic, workplace                        | 5 |
| 15. | Presence of non-participants | Was anyone else present besides the participants and researchers?                 | 5 |
| 16. | Description of sample        | What are the important characteristics of the sample? e.g. demographic data, date | 8 |

#### Data collection

|     |                        |                                                                               |    |
|-----|------------------------|-------------------------------------------------------------------------------|----|
| 17. | Interview guide        | Were questions, prompts, guides provided by the authors? Was it pilot tested? | 6  |
| 18. | Repeat interviews      | Were repeat interviews carried out? If yes, how many?                         | 5  |
| 19. | Audio/visual recording | Did the research use audio or visual recording to collect the data?           | 6  |
| 20. | Field notes            | Were field notes made during and/or after the interview or focus group?       | 7  |
| 21. | Duration               | What was the duration of the interviews or focus group?                       | 6  |
| 22. | Data saturation        | Was data saturation discussed?                                                | 18 |
| 23. | Transcripts returned   | Were transcripts returned to participants for comment and/or correction?      | 6  |

#### Domain 3: analysis and findings

##### Data analysis

|     |                       |                                      |   |
|-----|-----------------------|--------------------------------------|---|
| 24. | Number of data coders | How many data coders coded the data? | 7 |
|-----|-----------------------|--------------------------------------|---|

|     |                                |                                                             |            |
|-----|--------------------------------|-------------------------------------------------------------|------------|
| 25. | Description of the coding tree | Did authors provide a description of the coding tree?       | Appendix 2 |
| 26. | Derivation of themes           | Were themes identified in advance or derived from the data? | 7          |
| 27. | Software                       | What software, if applicable, was used to manage the data?  | 7          |
| 28. | Participant checking           | Did participants provide feedback on the findings?          | 6          |

### **Reporting**

|     |                              |                                                                                                                                   |     |
|-----|------------------------------|-----------------------------------------------------------------------------------------------------------------------------------|-----|
| 29. | Quotations presented         | Were participant quotations presented to illustrate the themes / findings? Was each quotation identified? e.g. participant number | Yes |
| 30. | Data and findings consistent | Was there consistency between the data presented and the findings?                                                                | Yes |
| 31. | Clarity of major themes      | Were major themes clearly presented in the findings?                                                                              | Yes |
| 32. | Clarity of minor themes      | Is there a description of diverse cases or discussion of minor themes?                                                            | Yes |
