# Supplementary material
Source: HighWire-hosted journal article supplement (https://bmjopen.bmj.com/content/8/10/e023068)
Supplement: inline-supplementary-material-5 [file inline-supplementary-material-5.pdf]

## Appendix 5: Complete list of researchers

### Cycle 1:

|                                                                |                                                            |
|----------------------------------------------------------------|------------------------------------------------------------|
| The Dartmouth Institute of Health Policy and Clinical Practice | University of California, Berkeley School of Public Health |
| Elliott Fisher (EF)                                            | Salma Bibi (SB)                                            |
| Manish Mishra (MM)                                             | Vanessa Hurley (VH)                                        |
|                                                                | Patricia Ramsay (PR)                                       |
|                                                                | Diane Rittenhouse (DR)                                     |
|                                                                | Hector Rodriguez (HR)                                      |
|                                                                | Stephen Shortell (SS)                                      |

### Cycle 2:

|                                                                |                                                            |
|----------------------------------------------------------------|------------------------------------------------------------|
| The Dartmouth Institute of Health Policy and Clinical Practice | University of California, Berkeley School of Public Health |
| Glyn Elwyn (GE)                                                | Salma Bibi (SB)                                            |
| Manish Mishra (MM)                                             | Susan Ivey (SI)                                            |
|                                                                | Kathryn McDonald (KM)                                      |
|                                                                | Patricia Ramsay (PR)                                       |
|                                                                | Hector Rodriguez (HR)                                      |
|                                                                | Stephen Shortell (SS)                                      |
